# Supplementary material for: Constructing a 2D/2D interfacial contact in ReS2/TiO2via Ti–S bond for efficient charge transfer in photocatalytic hydrogen production
Source: Royal Society of Chemistry journal article supplement (doi:10.1039/d1ta06039b), 2021-01-01
Supplement: d1ta06039b1.pdf [file d1ta06039b1.pdf]

## Electronic Supplementary Information

### Constructing 2D/2D interfacial contact in ReS<sub>2</sub>/TiO<sub>2</sub> via Ti-S bond for efficient charge transfer in photocatalytic hydrogen production

Yanan Wang<sup>a</sup>, Rongrong Shi<sup>a</sup>, Kai Song<sup>a</sup>, Chunyang Liu<sup>a</sup> and Fang He<sup>\*, a</sup>

<sup>a</sup>School of Materials Science and Engineering and Tianjin Key Laboratory of Composite and Functional Materials, Tianjin University, Tianjin, 300350, P.R. China.

\*Corresponding Author. E-mail: fanghe@tju.edu.cn.

## The gas reactions in chemical vapor deposition

In the experiment,  $\text{NH}_4\text{ReO}_4$  decompose thermally into gaseous  $\text{Re}_2\text{O}_7$  volatilizing according to following equation<sup>1</sup>:

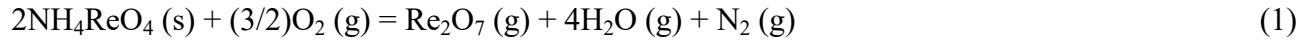

$\text{Re}_2\text{O}_7$  obtained by thermal decomposition of  $\text{NH}_4\text{ReO}_4$  may be further oxidized into  $\text{ReO}_4$  or deoxidized into  $\text{ReO}_3$ ,  $\text{ReO}_2$  and even  $\text{Re}$  at high temperatures.

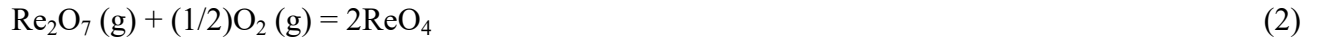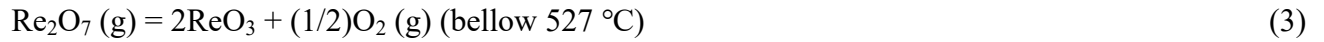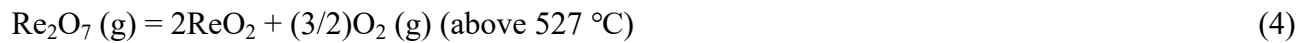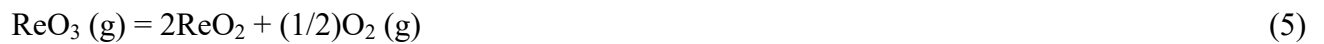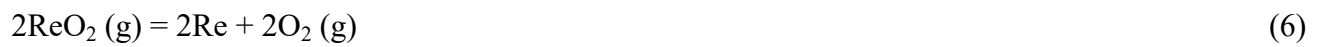

In the experiment, the above reaction cannot proceed completely. After kept for a certain period of time (10 min) at the temperature (700 °C) of CVD,  $\text{ReS}_2$  nanosheets were obtained by direct sulfidization of  $\text{ReO}_2$ <sup>2, 3</sup> and large amount of  $\text{SO}_2$  are released<sup>4</sup>. Finally,  $\text{ReS}_2$  nanosheets are deposited on the  $\text{TiO}_2$  surface via Ti-S bond to form 2D/2D interfacial contact in  $\text{ReS}_2/\text{TiO}_2$ .

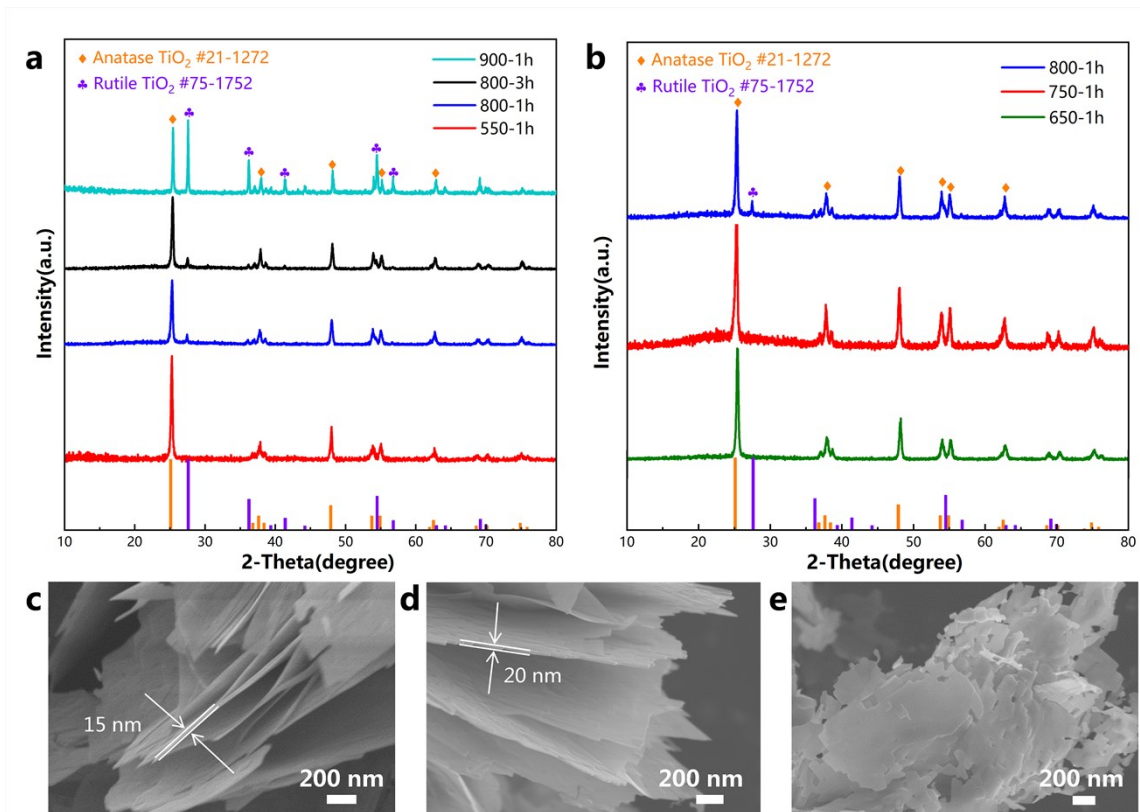

Figure S1 XRD patterns of TiO<sub>2</sub> calcined at different temperatures for 1 h (a, b) and calcined at 800 °C for 3h (black) in (a); SEM images of 550TiO<sub>2</sub> (c), 800TiO<sub>2</sub> (d) and 900TiO<sub>2</sub> (e).

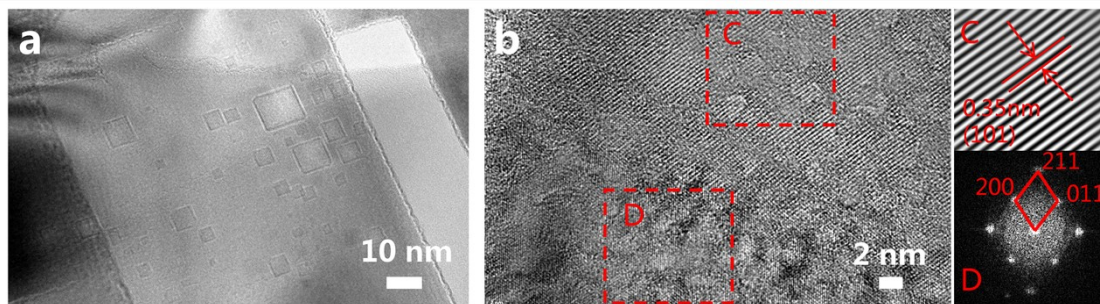

Figure S2 (a, b) TEM images of 800TiO<sub>2</sub>, the inset C is the fringe spacing of the region C and D is the diffraction spots of the region D in Figure S2.

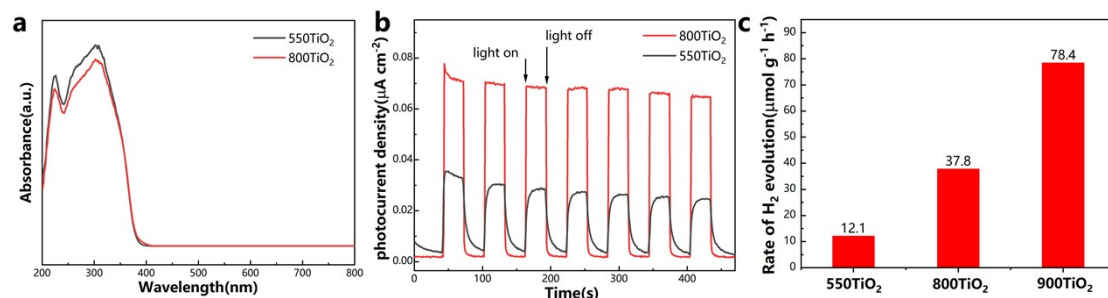

Figure S3 (a) UV-vis absorption spectra; (b) photocurrent density–time curves of 550TiO<sub>2</sub> and 800TiO<sub>2</sub> and (c) Comparison of the photocatalytic hydrogen production activities of TiO<sub>2</sub>.

Ultraviolet–visible (UV–vis) spectra are employed to investigate the optical absorption of TiO<sub>2</sub>. As shown in Figure S3a, 550TiO<sub>2</sub> and 800TiO<sub>2</sub> have similar optical absorption range, mainly light absorption in the UV region ( $\leq 400$  nm). As observed in Figure S3b, the transient photocurrent responses of 550TiO<sub>2</sub> and 800TiO<sub>2</sub> are measured at a bias potential of 0.6 V under UV-vis irradiation. The two photo-electrodes displayed a mild photocurrent response in the dark. When the light turns on, 800TiO<sub>2</sub> presents a higher photocurrent than single phase (550TiO<sub>2</sub>), suggesting that the mixed phases TiO<sub>2</sub> has stronger photocurrent response and lower recombination efficiency of photo-generated charge carriers. Subsequently, the photocatalytic hydrogen production tests are carried out under UV-vis irradiation. As depicted in Figure S3c, the two mixed phases TiO<sub>2</sub> (800TiO<sub>2</sub> and 900TiO<sub>2</sub>) show a significant increase in the hydrogen evolution performance, compared with the anatase TiO<sub>2</sub> (550TiO<sub>2</sub>).

**Table S1** Observed Raman peaks ( $\text{cm}^{-1}$ ) of  $\text{TiO}_2$ ,  $\text{ReS}_2$  and their corresponding assignments.

| Anatase $\text{TiO}_2$             |            | Anatase $\text{TiO}_2$             |            |                                    |             |
|------------------------------------|------------|------------------------------------|------------|------------------------------------|-------------|
| Raman peak<br>( $\text{cm}^{-1}$ ) | Assignment | Raman peak<br>( $\text{cm}^{-1}$ ) | Assignment | Raman peak<br>( $\text{cm}^{-1}$ ) | Assignment  |
| 143.4                              | $E_{g(1)}$ | 143.4                              | $B_{1g}$   | 148.7                              | $E_g$       |
| 195.8                              | $E_{g(2)}$ |                                    |            | 211.0                              | $A_g$ -like |
| 396.3                              | $B_{g(1)}$ |                                    |            | 305.2                              | $E_g$ -like |
| 515.7                              | $A_{g(1)}$ |                                    |            |                                    |             |
| 515.7                              | $B_{g(2)}$ |                                    |            |                                    |             |
| 638.9                              | $E_{g(3)}$ |                                    |            |                                    |             |

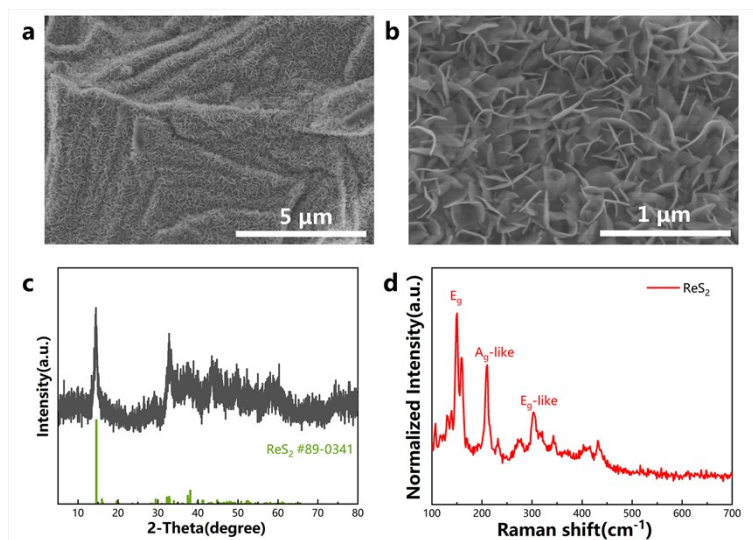

Figure S4 SEM images (a, b), XRD pattern (c) and Raman spectra (d) of  $\text{ReS}_2$ .

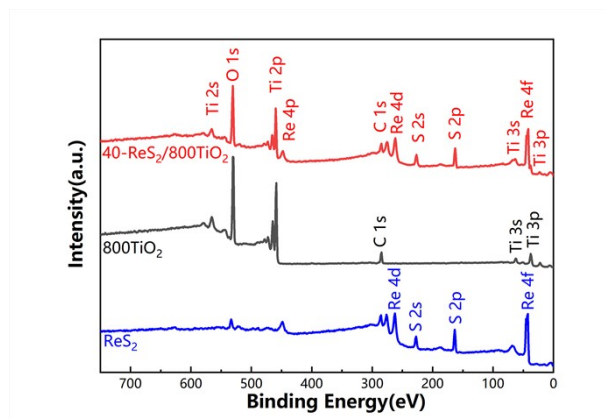

Figure S5 XPS survey spectra of  $\text{ReS}_2$ ,  $800\text{TiO}_2$  and  $40\text{-ReS}_2/800\text{TiO}_2$ .



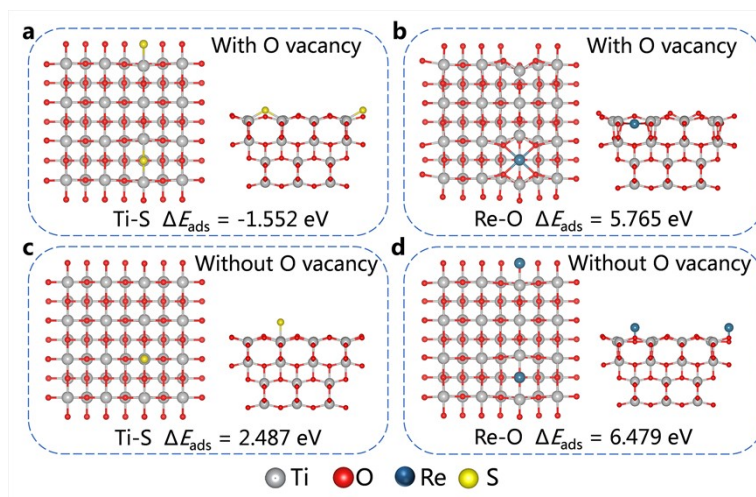

Figure S6 Four possible related structures accompanied by Ti-S and Re-O bonds and their corresponding adsorption energies. The top view on the left and the side view on the right. (a) one S atom adsorbed on the defective TiO<sub>2</sub> surface accompanied by Ti-S bond; (b) one Re atom adsorbed on the defective TiO<sub>2</sub> surface accompanied by Re-O bond; (c) one S atom adsorbed on the ideal TiO<sub>2</sub> surface accompanied by Ti-S bond; (d) one Re atom adsorbed on the ideal TiO<sub>2</sub> surface accompanied by Re-O bond.

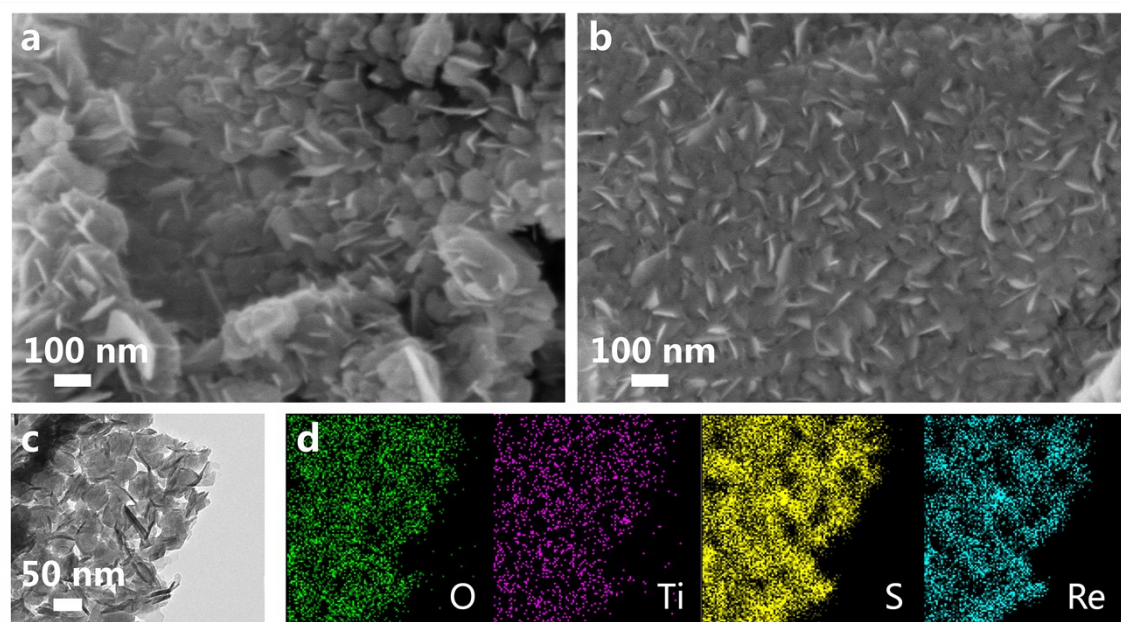

Figure S7 (a, b) SEM images, (c) TEM image and (d) element mapping images of ReS<sub>2</sub>/H-TiO<sub>2</sub>.

#### Synthesis of ReS<sub>2</sub>/H-TiO<sub>2</sub>:

To gain more O vacancies in the TiO<sub>2</sub> surface, 800TiO<sub>2</sub> is annealed in the tube furnace under H<sub>2</sub>/Ar mixture gas (the gas flow ratio is 100/100 sccm) at 600 °C for 1h, denoted as H-TiO<sub>2</sub>. ReS<sub>2</sub>/H-TiO<sub>2</sub> composites were prepared by CVD at 700 °C for 10 min, which is the same weight ratio as 40-ReS<sub>2</sub>/800TiO<sub>2</sub>.

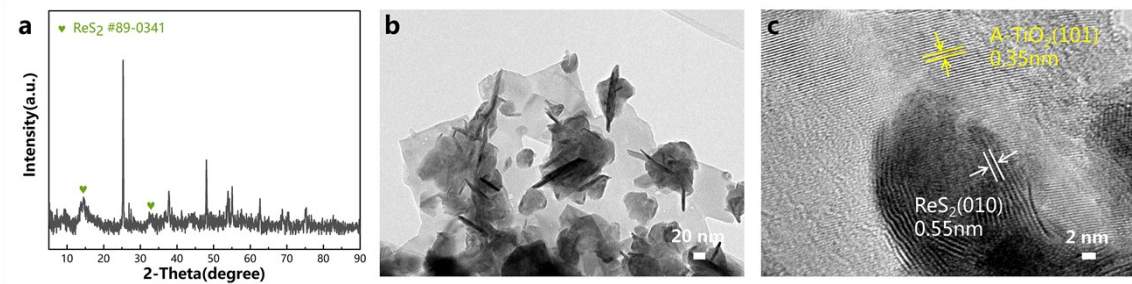

Figure S8 (a) XRD pattern, (b) TEM and (c) HRTEM images of 40-ReS<sub>2</sub>/800TiO<sub>2</sub> after 9 h cycles.

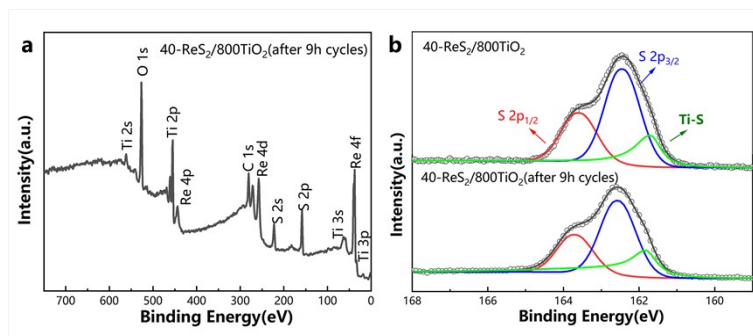

Figure S9 (a) XPS survey spectra of 40-ReS<sub>2</sub>/800TiO<sub>2</sub> after 9 h cycles, (b) S 2p peaks of 40-ReS<sub>2</sub>/800TiO<sub>2</sub> and 40-ReS<sub>2</sub>/800TiO<sub>2</sub> after 9 h cycles.

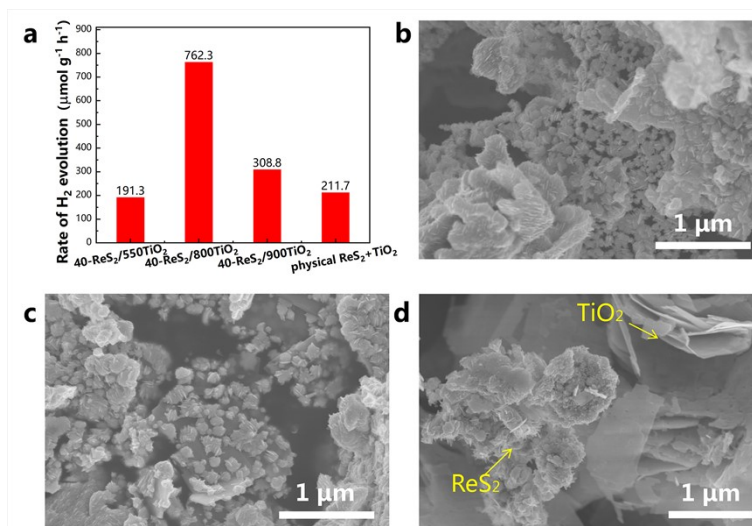

Figure S10 (a) Comparison of the photocatalytic hydrogen production activities of ReS<sub>2</sub>/TiO<sub>2</sub>; SEM images of ReS<sub>2</sub>/900TiO<sub>2</sub> (b, c) and physical ReS<sub>2</sub>+TiO<sub>2</sub> mixtures (d).

Figure S10b and c show the morphology of ReS<sub>2</sub>/900TiO<sub>2</sub>, which is very different from ReS<sub>2</sub>/800TiO<sub>2</sub>. Because the calcination temperature of 800TiO<sub>2</sub> is higher than that of 900TiO<sub>2</sub>, there are more O vacancies on the surface of 900TiO<sub>2</sub>, which causes the increased loading of ReS<sub>2</sub> nanosheets, as shown in Figure S10b and c. Not only the loading of ReS<sub>2</sub> nanosheets increased, but also the agglomeration of ReS<sub>2</sub> nanosheets arose and ReS<sub>2</sub> nanosheets coated small-sized TiO<sub>2</sub>. With the increase of the calcination temperature, the rutile ratio in TiO<sub>2</sub> increased (from 11% to 51%). It is possible that the state of rutile surface is not conducive to the growth of ReS<sub>2</sub>, thus, ReS<sub>2</sub> is more likely to agglomerate to reduce the surface energy. To sum up, the increase of O vacancies and rutile ratio is the main reason for the agglomeration and the encapsulation of ReS<sub>2</sub> nanosheets, which also causes the photocatalytic hydrogen evolution performance of 40-ReS<sub>2</sub>/900TiO<sub>2</sub> to be inferior to that of 40-ReS<sub>2</sub>/800TiO<sub>2</sub>.

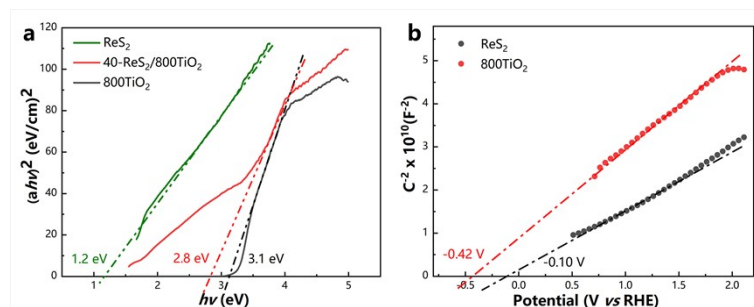

Figure S11 (a) the plots of  $(\alpha h\nu)^2$  versus energy ( $h\nu$ ) for the band gap energies of  $\text{ReS}_2$ ,  $800\text{TiO}_2$  and  $40\text{-ReS}_2/800\text{TiO}_2$ ; (b) Mott-Schottky plots of  $\text{ReS}_2$  and  $800\text{TiO}_2$ .

In order to obtain the energy band diagrams of  $\text{ReS}_2/\text{TiO}_2$ , the optical absorption properties of  $800\text{TiO}_2$ ,  $\text{ReS}_2$  and  $40\text{-ReS}_2/800\text{TiO}_2$  are studied by UV-vis absorption spectroscopy (Figure 6d). Figure S11a presents that the band gap energies of  $800\text{TiO}_2$ ,  $\text{ReS}_2$ , and  $40\text{-ReS}_2/800\text{TiO}_2$  are calculated as 3.1, 1.2 and 2.8 eV, respectively, according to the formula  $\alpha h\nu = A(h\nu - E_g)^2$  (where  $\alpha$  = absorbance,  $h$  = Planck's constant, and  $\nu$  = frequency). Hence, the combination of cocatalyst  $\text{ReS}_2$  improves the optical absorption of  $\text{TiO}_2$ , which induces more photo-generated carriers to participate in redox reaction. The Mott-Schottky (M-S) plots of  $800\text{TiO}_2$  and  $\text{ReS}_2$  shown in Figure S11b, the conduction band (CB) potential can be measured to be -0.42 and -0.1 V (vs RHE), corresponding to  $800\text{TiO}_2$  and  $\text{ReS}_2$ , respectively. The band gap energy ( $E_g$ ) of  $800\text{TiO}_2$  and  $\text{ReS}_2$  is calculated by the Tauc plot, thus, their valence band (VB) are calculated to be +2.68 and +1.10 V, respectively.

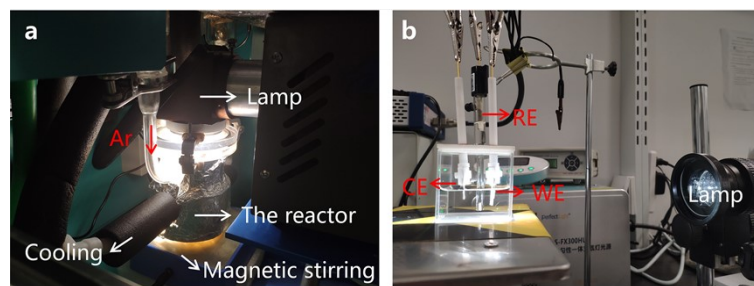

Figure S12 The reactors of photocatalytic hydrogen production test (a) and Photoelectrochemical Measurements (b).

## References

1. M. Bai, Z.-h. Liu, L.-j. Zhou, Z.-y. Liu and C.-f. Zhang, *Transactions of Nonferrous Metals Society of China*, 2013, **23**, 538-542.
2. X.-h. Fan, Q. Deng, M. Gan and X.-l. Chen, *Transactions of Nonferrous Metals Society of China*, 2019, **29**, 840-848.
3. Q. Feng, M. Li, T. Wang, Y. Chen, X. Wang, X. Zhang, X. Li, Z. Yang, L. Feng, J. Zheng, H. Xu, T. Zhai and Y. Jiang, *Applied Catalysis B: Environmental*, 2020, **271**.
4. K. S. Coleman, J. Sloan, N. A. Hanson, G. Brown, G. P. Clancy, M. Terrones, H. Terrones and M. L. H. Green, *Journal of the American Chemical Society*, 2002, **124**, 11580-11581.
